# Supplementary material for: Impact of Socioeconomic Status on Health Behaviors, Metabolic Control, and Chronic Complications in Type 2 Diabetes Mellitus
Source: PubMed Central journal article supplement — Diabetes Metab J. 2018 Jun 29;42(5):380–93. doi: 10.4093/dmj.2017.0102 (PMC6202566; doi:10.4093/dmj.2017.0102), 2018-06-29
Supplement: dmj-42-380-s001.pdf [file dmj-42-380-s001.pdf]

**Supplementary Table 1.** Clinical and laboratory characteristics according to gender

| Characteristic                | Total                     | Male                      | Female                    | P value <sup>a</sup> |
|-------------------------------|---------------------------|---------------------------|---------------------------|----------------------|
| Number                        | 3,294                     | 1,927 (58.5)              | 1,367 (41.5)              |                      |
| Age, yr                       | 52 (46–58)                | 51 (45–57)                | 54 (49–60)                | <0.001               |
| Diabetes duration, yr         | 4 (1–10)                  | 4 (1–9)                   | 4 (1–10)                  | 0.386                |
| BMI, kg/m <sup>2</sup>        | 25.0 (23.0–27.1)          | 25.0 (23.1–26.9)          | 24.9 (22.8–27.4)          | 0.734                |
| SBP, mm Hg                    | 125 (116–134)             | 126 (117–135)             | 123 (113–133)             | 0.028                |
| DBP, mm Hg                    | 80 (70–85)                | 80 (71–85)                | 80 (70–83)                | <0.001               |
| FPG, mg/dL                    | 136 (116–167)             | 138 (119–173)             | 132 (112–162)             | <0.001               |
| 2-Hour PPG, mg/dL             | 250 (185–327)             | 249 (180–327)             | 253 (193–328)             | 0.564                |
| HbA1c, %                      | 7.4 (6.6–8.8)             | 7.4 (6.5–8.9)             | 7.4 (6.7–8.6)             | 0.829                |
| Triglyceride, mg/dL           | 135 (91–197)              | 140 (92–205)              | 130 (90–184)              | <0.001               |
| HDL-C, mg/dL                  | 46 (39–54)                | 45 (38–53)                | 48 (41–56)                | <0.001               |
| LDL-C, mg/dL                  | 102 (80–126)              | 100 (78–123)              | 105 (83–105)              | <0.001               |
| LTPA, kcal/day                | 266.3 (138.1–447.3)       | 265.7 (131.0–441.9)       | 266.5 (146.1–457.2)       | 0.270                |
| BEPSI score                   | 2.0 (1.0–2.0)             | 2.0 (1.0–2.0)             | 2.0 (1.0–3.0)             | 0.003                |
| Energy intake, kcal/day       | 1,793.7 (1,560.7–2,055.3) | 1,917.6 (1,689.8–2,162.3) | 1,639.4 (1,426.2–1,873.5) | <0.001               |
| Protein intake, % energy      | 16.9 (14.9–19.1)          | 17.1 (14.9–19.2)          | 16.7 (14.7–19.1)          | 0.066                |
| Carbohydrate intake, % energy | 60.6 (54.2–66.4)          | 59.1 (52.4–64.6)          | 62.4 (56.4–68.4)          | <0.001               |
| Fat intake, % energy          | 21.9 (17.2–26.8)          | 22.3 (18.1–27.2)          | 21.2 (16.2–25.9)          | <0.001               |
| Fiber intake, g/1,000 kcal    | 14.9 (11.8–14.9)          | 14.0 (11.3–17.0)          | 16.0 (13.0–19.4)          | <0.001               |
| UACR, mg/g Cr                 | 10.0 (5.4–26.4)           | 10.9 (5.4–30.4)           | 9.2 (5.4–21.8)            | 0.009                |
| Current drinking, %           | 53.8                      | 72.7                      | 27.0                      | <0.001               |
| Current smoking, %            | 24.1                      | 38.2                      | 4.2                       | <0.001               |
| Education level, %            |                           |                           |                           |                      |
| Less than high school         | 34.8                      | 22.1                      | 52.7                      | <0.001               |
| High school graduation        | 36.6                      | 38.5                      | 34.0                      |                      |
| College graduation            | 28.6                      | 39.5                      | 13.3                      |                      |
| Monthly household income, %   |                           |                           |                           |                      |
| <1,700 US\$                   | 37.2                      | 28.1                      | 50.4                      | <0.001               |
| 1,700–3,400 US\$              | 35.4                      | 37.0                      | 33.0                      |                      |
| >3,400 US\$                   | 27.5                      | 34.9                      | 16.6                      |                      |
| Medication use, %             |                           |                           |                           |                      |
| Insulin                       | 18.3                      | 18.5                      | 18.0                      | 0.770                |
| Sulfonylureas                 | 44.1                      | 44.9                      | 43.0                      | 0.161                |
| Metformin                     | 63.8                      | 61.4                      | 67.2                      | 0.001                |
| ARB or ACE inhibitor          | 37.7                      | 38.1                      | 37.0                      | 0.560                |
| Statin                        | 38.2                      | 36.7                      | 40.3                      | 0.052                |
| Diabetic retinopathy, %       | 19.7                      | 19.4                      | 20.0                      | 0.730                |
| Albuminuria, %                | 22.6                      | 25.4                      | 18.7                      | <0.001               |
| HbA1c (≥7.5%), %              | 45.6                      | 45.8                      | 45.5                      | 0.887                |
| Obesity, %                    | 50.1                      | 50.8                      | 49                        | 0.338                |

Values are presented as number (%) or median (interquartile range).

BMI, body mass index; SBP, systolic blood pressure; DBP, diastolic blood pressure; FPG, fasting plasma glucose; PPG, postprandial glucose; HbA1c, glycosylated hemoglobin; HDL-C, high density lipoprotein cholesterol; LDL-C, low density lipoprotein cholesterol; LTPA, leisure time physical activity; BEPSI, Brief Encounter Psychosocial Instrument; UACR, urinary albumin creatinine ratio; ARB, angiotensin receptor blocker; ACE, angiotensin converting enzyme.

<sup>a</sup>P value was obtained by Mann-Whitney *U* test or chi-square test as appropriate.
